1 **Carbon acquisition in a Baltic pico-phytoplankton species - Where does the carbon for**  
2 **growth come from?**

3 **Contributing authors:**

4 Luisa Listmann<sup>1,2</sup>, Franziska Kerl<sup>1</sup>, Nele Martens<sup>1</sup>, C-Elisa Schaum<sup>1,2</sup>

5 **Author affiliations:**

6 <sup>1</sup> University of Hamburg, Institute for Marine Ecosystem and Fisheries Science, 22767 Hamburg

7 <sup>2</sup> Centre for Earth System Science and Sustainability, 20146 Hamburg

8 **Corresponding author**

9 [luisa.listmann@uni-hamburg.de](mailto:luisa.listmann@uni-hamburg.de)

10  
11 **Summary:**

- 12 - Pico-phytoplankton have ample scope to react to environmental change. But we know  
13 little about the underlying physiological mechanisms that govern how evolutionary  
14 history may affect short-term responses to environmental change.
- 15 - We investigated growth rates and carbon uptake related traits (i.e. fitness proxies) in  
16 different temperatures and at different times during the microbial growth curve of  
17 eight novel strains of *Ostreococcus* sp. (ca. 1-2µm). The strains were isolated from  
18 two distinct regions of the Baltic Sea differing in salinity and temperature from North-  
19 East (Bornholm Basin) to South-West (Kiel area).
- 20 - Strains from the warmer, more variable Kiel area had higher growth rates in general  
21 and showed more variable growth rates compared to strains from the colder and less  
22 variable Bornholm Basin.
- 23 - In addition, growth was maintained in early stages of the growth curve by organic  
24 carbon acquisition and the increase in growth over time and with temperature was  
25 associated with an increase in inorganic carbon acquisition (net primary productivity).
- 26 - Based on the differences between net primary productivity and potential growth on  
27 organic carbon, we postulate a shift in carbon acquisition between inorganic and  
28 organic sources in *Ostreococcus* sp. with potential implications on ecological  
29 dynamics within microbial communities.
- 30 - **Key words:** Pico-phytoplankton, environmental change, carbon acquisition,  
31 evolutionary history, primary production

32 **Introduction:**

33 In recent years, temperatures in the atmosphere and sea surface have been increasing at an  
34 unprecedented rate, putting organisms into environmental conditions that they have likely not  
35 experienced before (*IPCC Fifth Assessment Report - Synthesis Report*, 2014). An organism  
36 can react to a changing environment through a combination of strategies such as moving to  
37 other locations, coping with changes *via* plasticity (i.e. phenotypic variation within one  
38 genotype), adapting (i.e. evolutionary change that leads to an increase in fitness) or in the  
39 worst case, die (Gienapp *et al.*, 2008). Here, we investigate the adaptive response (i.e. how  
40 growth rates differ with respect to temperature in the short-term within several generations) of  
41 a pico-phytoplankton species *Ostreococcus* sp. from the Baltic Sea. Growth rates as fitness  
42 proxies can indicate the direction and magnitude of change in fitness (Elena & Lenski, 2003).  
43 In addition to understanding if short-term responses to warming in *Ostreococcus* vary, we are  
44 also interested in *how*. Thus, we also want to mechanistically link evolved growth responses  
45 to the underlying metabolic responses.

46 Pico-phytoplankton are a globally distributed group of microbial photosynthetic primary  
47 producers that make up about 0.53–1.32 Pg C of the marine biomass and contribute to ca.  
48 20% of marine primary production (Worden *et al.*, 2004; Buitenhuis *et al.*, 2012). In coastal  
49 areas, pico-phytoplankton can temporarily contribute up to 80% to the marine production of  
50 oxygen via photosynthesis and fuel biogeochemical cycles (Worden, 2006). As primary  
51 producers, they assimilate inorganic carbon (CO<sub>2</sub>) and have important cascading effects on  
52 higher trophic levels in the marine food web (Field *et al.*, 1998; Falkowski *et al.*, 2008). In  
53 addition, high growth rates and large populations size with high standing genetic variation  
54 (Reusch & Boyd, 2013) enable pico-phytoplankton, as well as other microbial species, to  
55 track today's rapid changes in the environment *via* fast plastic responses and evolutionary  
56 change and often through a combination of both (Lenski & Travisano, 1994; Wisser *et al.*,  
57 2013; Levis *et al.*, 2016).

58 Previous experimental long-term studies have shown that phytoplankton are indeed able to  
59 adapt to environmental change within a few hundred generations which translate to several  
60 months to years in the laboratory (Lohbeck *et al.*, 2012; Schlüter *et al.*, 2014; Listmann *et al.*,  
61 2016; Schaum *et al.*, 2018). Despite their insights into the adaptive potential of phototrophic  
62 microbes, these experiments focus mainly on single strains (i.e. genotypes) of species from  
63 culture collections and are very time consuming and large experiments. As a result, they only  
64 capture a drastically reduced image of ecological variability. The latter, however, may add to

65 the characterization of the adaptive potential of organisms, because with ecological variation,  
66 the range of phenotypes within a species, that essentially selection can act on, increases (Des  
67 Roches *et al.*, 2018). In this study we circumvent the limitations of long-term experimental  
68 studies on laboratory strains by using two approaches: First, to account for a degree of  
69 ecological variability (Boyd *et al.*, 2013; Hattich *et al.*, 2017; Godhe & Rynearson, 2017), we  
70 use not one, but eight strains of the same species complex. Second, in order to investigate the  
71 evolved response to warming, we use strains of the same species complex with different  
72 environmental histories - an approach called space for time substitution (Likens, 1989).

73 To understand *how* pico-phytoplankton evolve to warming, we want to link growth responses  
74 to the underlying metabolic responses (e.g. Padfield *et al.*, 2016). Metabolic responses that are  
75 associated with growth can include nutrient uptake related strategies (Sommer, 1984;  
76 Edwards *et al.*, 2015), metabolic responses within the cell for energy turnover or allocation  
77 (Rokitta *et al.*, 2016; Collins & Schaum, 2019) or, as is most important for primary producers,  
78 carbon uptake related strategies (Rost *et al.*, 2006). Several studies on different phytoplankton  
79 groups have demonstrated that net primary production, which describes the uptake of carbon  
80 for growth, can change in response to changes in the environment essentially modulating the  
81 relationship of net primary production and growth (Schaum *et al.*, 2017b; Barton *et al.*, 2020).  
82 These indicate that inorganic carbon is assimilated in different quantities. However, these  
83 studies have so far mainly investigated the responses in cultures at exponential phase in the  
84 microbial growth curve. This allows us to understand metabolic dynamics that are associated  
85 with exponential growth, but it ignores that ample theory in ecology and evolution would  
86 predict the existence of multiple strategies both depending on the environmental condition  
87 and the life cycle state of a microbial organism (Halsey *et al.*, 2013; García-Carreras *et al.*,  
88 2018). Here, we additionally focus on metabolic responses during early and late exponential  
89 growth phases rather than only the maximum exponential growth phase of the microbial  
90 growth curve.

91 Phytoplankton species can be divided into different functional groups regarding their carbon  
92 uptake. Of these, photoautotrophs assimilate carbon via photosynthesis while mixotrophic  
93 phytoplankton acquire their carbon either via photosynthesis or uptake of organic carbon  
94 compounds (Rebecca Lindsey & Scott Design by Robert Simmon, 2010). In this study, we  
95 focus on a globally distributed pico-phytoplankton species, *Ostreococcus* sp., which has a size  
96 of about 1µm and is the smallest known free-living eukaryote (Courties *et al.*, 1994;  
97 Rodríguez *et al.*, 2005). *Ostreococcus* sp. is characterized as a photoautotrophic species, i.e.

108 using CO<sub>2</sub> as its carbon source for growth (Courties *et al.*, 1994). However, it has been shown  
109 that *Ostreococcus* has the potential to grow in the dark relying on other carbon sources (e.g.  
110 sorbitol) that do not directly come from co-occurring photosynthesis (van Ooijen & Millar,  
111 2012). Therefore, in *Ostreococcus* other carbon uptake related strategies could play a role to  
112 sustain growth. Here, we want to specifically test whether and under which conditions uptake  
113 of organic carbon occurs in the light. In other words, instead of solely investigating how much  
114 carbon is allocated to growth, we study where the carbon for growth is coming from,  
115 considering effects of changes in the thermal environment (temperature assay), evolutionary  
116 history (via space for time substitution), and the life cycle (throughout a growth curve). In  
117 addition, we investigate how much intraspecific variation exists in carbon uptake related  
118 strategies.

119 We successfully isolated eight novel strains of *Ostreococcus tauri* (7) and *Ostreococcus*  
120 *mediterraneus* (1) in Spring of 2018 (RV ALKOR cruise AL505) (Table 1) from the Baltic  
121 Sea in order to study a range of strains of the same species complex with different  
122 evolutionary histories. The Baltic Sea is characterized by different environmental gradients  
123 including for example temperature, salinity or nutrients (Leppäranta, Matti, 2009) that have  
124 changed in the last decades (Zhong *et al.*, 2020). Here, we focus on two regions in the South-  
125 West and East of the Baltic, the Kiel area and Bornholm Basin, differing mainly in  
126 temperature and salinity. The respective gradients range from warmer, more variable  
127 temperatures and higher salinity in the Kiel area compared to colder, less variable  
128 temperatures and lower salinity in the Bornholm Basin. On the new strains of *Ostreococcus*  
129 sp., we measured the growth response to two different temperatures and how the respective  
130 evolutionary trajectories affected this response. In addition, by quantifying net primary  
131 production *via* photosynthesis and respiration measurements (Schaum *et al.*, 2017a) and  
132 potential growth on organic carbon substrates (Hackett & Griffiths, 1997; Rutgers *et al.*,  
133 2016), we characterized different strategies of how growth can be maximized (or changed) in  
134 varying environments and at different time-points during the exponential growth phase.

125

## 126 **Material and Methods:**

### 127 *Ostreococcus* isolation and experimental set-up:

128 We isolated *Ostreococcus* sp. from pico-phytoplankton community samples obtained during a  
129 RV ALKOR cruise (AL505) in 2018 (see Fig. 1a and Table 1 for sampling dates and

130 locations) using a Niskin bottle at 5m. Community samples were immediately passed through  
131 a 35µm sieve to remove grazers and large debris, and then further size fractioned *via* gentle  
132 filtration through a 2µm membrane filter (kept filtrate) and a 0.2µm filter (kept filter and  
133 rinsed gently). From these samples, we successfully isolated eight new strains of  
134 *Ostreococcus* sp. (see Table 1 for details); five from the Kiel area and three from the  
135 Bornholm Basin.

136 The eight new strains were cultured to determine their growth rate and metabolism response  
137 to 15°C and 22°C (spanning late spring and late summer temperatures). The experiment had  
138 to be carried out in three subsequent batches due to the limited number of metabolic  
139 measurements possible at the same time (see Fig. **1b**, Table 1). The batches were all set up the  
140 same way: each strain was replicated three times and each replicate inoculated with 3000  
141 cells/mL in 40mL f/2 media (Guillard, 1975) of the respective salinity of isolation (Table 1).  
142 All replicated cultures were exposed to the two treatment temperatures with a 12:12 day and  
143 night cycle at 100µE light intensity for 18 days ensuring growth through a whole microbial  
144 growth cycle (Fig. **1c**). Starting at day three of microbial growth we measured cell numbers  
145 daily *via* flow cytometry (BD Accuri C6 flow cytometer) and starting on day four to five, we  
146 measured photosynthetic metabolic activity daily *via* optical O<sub>2</sub> measurements (Fig. **1d**).

147 Due to logistic limitations, for the measurement of growth on organic carbon sources we set  
148 up an additional experiment using six representative strains of the eight isolated *Ostreococcus*  
149 strains (four from Kiel and two from Bornholm, respectively) (Fig. **1e**). Each strain was  
150 inoculated at 3000 cells/mL in 200 mL of f/2 media (Guillard, 1975) of the respective salinity  
151 of isolation and exposed to both 15°C and 22°C with a 12:12 day and night cycle at 100µE  
152 light intensity. At three time points during the microbial growth curve (determined via the  
153 preceding growth experiments), we investigated the potential of each strain to grow on 31  
154 different organic carbon sources using ecoplates (Biolog EcoPlate™).

#### 155 *Determination of growth rates and net primary production in experiments 1-4.*

156 On the daily cell count measurements, we fitted a growth curve containing a lag phase,  
157 exponential phase and carrying capacity. To analyse the shape of the growth curves, non-  
158 linear curve fitting of a gompertz growth model (Buchanan *et al.*, 1997) was carried out using  
159 the ‘nlsLoop’ function in the R package, ‘nlsLOOP’ (version 1.2-1). Parameter estimation  
160 was achieved by running 1,000 different random combinations of starting parameters for cell  
161 count at carrying capacity, duration of lag phase, and maximum growth rate picked from a  
162 uniform distribution. The script then retained the parameter set that returned the lowest

163 Akaike information criterion (AICc) score, yielding  $\mu_{max}$  and *day at  $\mu_{max}$* . In addition, we  
164 calculated growth rates at early and late exponential phase (three days before and after day at  
165  $\mu_{max}$ , respectively) using the following formula ( $\ln(N_t - N_{t-1})$ ) with N being the number of  
166 cells/ml. The *day at  $\mu_{max}$*  was important for subsequent analysis of growth on organic carbon  
167 sources (see Table S1).

168 Net photosynthesis and respiration rates were measured on PreSens ® SDR Sensor Dish  
169 optodes. We measured oxygen production for 15 minutes in the light, and respiration for 15  
170 minutes in the dark under the light- and temperature conditions set in the incubator (i.e. all  
171 experimental units at their assay temperatures). All characterizations were carried out at the  
172 same time of day (9am to 11am). From these measurements we calculated net primary  
173 production rates (following (Falkowski *et al.*, 1985) in  $\mu\text{gC}\cdot\text{cell}^{-1}\cdot\text{day}^{-1}$ ).

174 *Potential growth on carbon via ecoplates.*

175 Here we were interested, if and how much a culture could grow on a number of different  
176 carbon sources that we provided via the ecoplates. Based on Exp. 1-3 we identified three time  
177 points (corresponding to three different days during the microbial growth cycle) at which we  
178 then measured growth on organic carbon. These time points were “early exponential phase”  
179 three days prior to day at  $\mu_{max}$ , “mid exponential phase” at  $\mu_{max}$  and “late exponential  
180 phase” three days later than day at  $\mu_{max}$ . The actual days of inoculation into ecoplates varied  
181 between the different strains of *Ostreococcus* and treatment temperatures (see Table S2 for  
182 details). Each ecoplate contained 31 different organic carbon sources in triplicates and three  
183 controls with water (see Rutgers *et al.*, 2016 for list of sources and groups thereof and Fig.  
184 S1). Each of the 96 wells was inoculated with 200 $\mu\text{l}$  of culture (except one control of water  
185 with only MQ) and then left to grow for 24h at the respective experimental condition as the  
186 original culture. After 24h we fixed the samples with sorbitol (3 $\mu\text{l}$  in 200 $\mu\text{l}$  sample) for 24h at  
187 4°C in the dark and then froze them for later analysis via flow cytometry. After thawing the  
188 ecoplates overnight we counted the cells in each well and calculated the relative change in cell  
189 numbers on organic carbon compared to the control (on water). In addition, we calculated an  
190 overall value of relative increase in cell numbers on organic carbon compared to a control  
191 without the addition of organic carbon the following way: First, we calculated the mean of  
192 cells/mL for the control wells that only contained water; second, we calculated the relative  
193 change in cells/mL for each of the 93 wells that contained a carbon source compared to the  
194 control (i.e. “water”, no other organic carbon source). Third, we counted the number of wells  
195 where the relative change in cell numbers was positive. And last, the overall potential growth

196 on organic carbon was then calculated as the mean of the relative increase of cells normalized  
197 by the number of wells on which the relative increase was positive.

198

### 199 *Statistical analysis*

200 All data were analysed in the R programming environment (version 3.6.3.) using the  
201 following packages ‘nlme’, ‘ggpot2’, ‘lme4’, ‘emmeans’, ‘vegan’, ‘reshape2’, and  
202 ‘multcomp’.

203 All experimental responses ( $\mu_{\max}$ , growth rate at early and late exponential phase, net  
204 primary production and overall growth on organic carbon) were analysed with a linear mixed  
205 effects model (lme) (within the nlme package, version 3.1-137). We focused on the effect of  
206 timing (i.e. differences between early, mid and late exponential phase in the microbial growth  
207 curve) at 22°C and the effect of temperature in the mid exponential phase since we had all  
208 experimental responses for these time points and temperatures. The responses were first  
209 analysed *via a global model* (Table S5-7 supplements) that included sampling location (Kiel  
210 area or Bornholm Basin) and assay temperature (15°C and 22°C) or time (for the responses at  
211 early, mid and late exponential phase) as fixed factors in full interaction. The “experiment”  
212 (Exp 1-3 for  $\mu_{\max}$  and net primary production) was computed as a nested random effect  
213 within region. We subsequently analysed the growth rate again for each region separately to  
214 further characterize the intra-regional variation of responses at mid exponential phase and in  
215 response to temperature (*regional model* Table S5supplements). The regional model included  
216 strains (five different ones in the *Kiel regional model* and three different ones in the *Bornholm*  
217 *regional model*, respectively) and assay temperature (15°C and 22°C) as fixed factors in full  
218 interaction. All lme models were reduced to the single and interacting factors containing the  
219 lowest AICc score with a minimum difference of 2.

220 The changes in cell numbers on the organic carbon compounds was analysed in two ways:  
221 First we analysed the differences in the groups of carbon compounds via a linear mixed  
222 effects model containing the effect of timing at 22°C (see above) and temperature in mid  
223 exponential phase as well as the effects of region and “carbon group”. The lme model was  
224 reduced to the single and interacting factors containing the lowest AICc score with a  
225 minimum difference of 2. Second, we confirmed the statistical analysis on the relative growth  
226 on carbon and changes in cell numbers via a PCA analysis and subsequent permanova that  
227 tested again for the effect of timing at 22°C (see above) and temperature in mid exponential



228 phase. The difference to the first analysis is, that it includes the differences between all 31  
229 carbon sources and how the complete use of all the sources differed between time-points,  
230 temperature and regions.

231

232

### 233 **Results:**

#### 234 *Adaptive response in *Ostreococcus* measured via growth rates*

235 Following the expected shape of a microbial growth curve, the highest growth rates were  
236 reached in the middle of the microbial growth curve and lower (down to no growth) at the  
237 early stage of the microbial growth curve both in the Kiel and Bornholm strains (Fig. 2, Table  
238 S5 *Global model* (TI) Effect of “Timing”  $F_2=4.990$ ,  $p=0.011$ ). Towards the end of the  
239 exponential phase, growth rate decreased again but not significantly (contrast mid to late  
240 exponential phase  $t\text{-ratio}=1.704$ ,  $p=0.5357$ ). In the Kiel strains, the growth rates were higher  
241 in all three phases compared to the Bornholm region (Fig. 2, Table S5 *Global model* (TI)  
242 Effect of “Region”  $F_1=11.779$ ,  $p=0.001$ ). All strains of *Ostreococcus* increased their growth  
243 rate from 15°C to 22°C (Fig 2, Table S5 *Global model* (TE) Effect of “Temperature”  $F_1$   
244  $=40.162$ ,  $p<0.0001$ ), however, this increase varied strongly between the strains within the  
245 Kiel region (Table S5 *Regional model* (Kiel) Effect of “Temperature”  $F_1=31.725$ ,  $p=0.0001$ ;  
246 Effect of “Isolate”  $F_4=7.618$ ,  $p=0.003$ ) and between the two regions (Table S5 *Global model*  
247 (TE) Effect of “Region”  $F_1=15.430$ ,  $p=0.0005$ ). This indicated an effect of the absolute  
248 difference in experienced past environment including the variability therein; in other words,  
249 their evolutionary history.

#### 250 *Inorganic carbon acquisition*

251 The net primary production in both Kiel and Bornholm strains increased with temperature at  
252 mid exponential phase (Fig. 3, Table S6 *Global model* (TE) Effect of “Temperature”  $F_1$   
253  $=8.818$ ,  $p=0.0005$ ) and from early to mid exponential phase at 22°C as well (Fig 3, Table S6  
254 *Global model* (TI) Effect of “Timing”  $F_1=36.583$ ,  $p<0.0001$ ). From mid to late exponential  
255 phase there was no significant increase anymore (contrast mid to late exponential phase  $t\text{-}$   
256  $\text{ratio}=-0.398$ ,  $p=0.916$ ). At the mid exponential phase, net primary production was slightly but  
257 not significantly higher in the Bornholm strains compared to the Kiel strains both at 22°C and  
258 15°C (Fig. 3, Table S6 *Global model* (TE) Effect of “Region”  $F_1=1.999$ ,  $p=0.261$ ). At the



259 early exponential phase at 22°C net primary production was, however, lower in Bornholm  
260 (Figure 3, Table S6 *Global model* (TI) Effect of “Timing \* Region”  $F_1 = 5.093$ ,  $p = 0.006$ ). Net  
261 primary production increased in most cases because GP became relatively higher compared to  
262 R (supplementary Fig. S3).

### 263 *Growth on organic carbon sources and correlation to net primary production*

264 Due to experimental limitations, we were only able to measure growth on organic carbon  
265 sources on one representative replicate of four strains from the Kiel area and two strains from  
266 the Bornholm area, respectively. Thus, a comparison between the strains was statistically not  
267 possible. Averaged over all the organic sources we did find a higher use of organic carbon  
268 sources by isolates from Kiel compared to Bornholm at mid exponential phase in both assay  
269 temperatures (Fig. 4, Table S7 *Global model* (TE) Effect of “Region”  $F_1 = 11.416$ ,  $p = 0.027$ ) as  
270 well as early and late exponential phase at 22°C (Fig. 4, Table S7 *Global model* (TI) Effect of  
271 “Region”  $F_1 = 6.531$ ,  $p = 0.063$ ). In addition to the overall difference between the regions we  
272 also found effects of the timing of measurement and temperature: on the one hand, the growth  
273 on organic carbon in both Kiel and Bornholm strains decreased from early to mid and late  
274 exponential phase at 22°C (Fig. 4 Table S7 *Global model* (TI) Effect of “Timing”  $F_2 = 12.398$ ,  
275  $p = 0.002$ ). On the other hand, at mid exponential phase, the growth on organic carbon sources  
276 was higher at 15°C compared to 22°C in both areas (Fig 4, Table S7 *Global model* (TE)  
277 Effect of “Temperature”  $F_1 = 5.730$ ,  $p = 0.062$ ).

278 In addition to the differences in growth when all carbon sources were considered together, we  
279 found that at different sampling times and temperatures the carbon sources were used in  
280 different quantities (Fig. 5). In the early exponential phase on all carbon groups except for the  
281 polymers (Cyclodextrin and Glycogen, see Fig. S4), cell numbers increased in the strains  
282 from Kiel, whereas in the Bornholm strains this was mainly observed on carbohydrates and  
283 carboxylic acids (Fig 5a, Table S9 (TI), Effect of “Region\*Carbon Group”  $F_5 = 3.798$ ,  
284  $p = 0.002$ ). At mid and late exponential phase, there were fewer sources on which cell numbers  
285 increased in the Kiel strains and there was no further increase in cell numbers on carbon  
286 sources in the Bornholm strains (Fig 5b, Table S9 (TI), Effect of “Timing”  $F_2 = 67.528$ ,  
287  $p < 0.0001$ ). In the Kiel strains, there was still use of amines and carbohydrates at mid  
288 exponential and phenolic compounds in the late exponential phase (Fig 5a, Table S9 (TI),  
289 Effect of “Timing\*Region”  $F_2 = 9.290$ ,  $p = 0.0001$ ). In addition, at 15°C compared to 22°C  
290 there were more carbon groups used in both Kiel and Bornholm strains (Fig 5b, Table S9  
291 (TE), Effect of “Temperature”  $F_1 = 37.202$ ,  $p < 0.0001$ ), however differently so between the

292 regions (Fig. **5b**, Table S9 (TE), Effect of “Temperature\*Region”  $F_1 = 9.334$ ,  $p=0.0023$ ). In  
293 the Kiel strains resources from all groups except for the polymers lead to an increase in cell  
294 numbers and in Bornholm strains this was only the case on amines and carboxylic acids (Fig  
295 **5b**, Table S9 (TE), Effect of “Region\*Carbon Group”  $F_5 = 3.798$ ,  $p=0.002$ ).

296

297

298

### 299 **Discussion:**

300 In our study on carbon uptake in *Ostreococcus sp.* from the Baltic Sea, we showed that there  
301 is an adaptive signature of warming or at the very least in the absence of molecular evidence,  
302 of processes acting on time-scales beyond acclimation and plasticity. Furthermore, we found  
303 different circumstances with respect to temperature and time in microbial growth curve when  
304 inorganic and organic carbon were used for growth.

305 With respect to the question if *Ostreococcus* has an adaptive signature of its origin we showed  
306 that strains from the warmer and more variable Kiel area showed higher growth rates in  
307 general and a more variable response to temperature as well. This was the opposite in the  
308 strains from the colder, less variable Bornholm Basin. These findings are consistent with the  
309 expectations based on short-term (within several generations) response measurements (Zhong  
310 *et al.*, 2020) where the origin of the communities and thus their evolutionary history affected  
311 all key functional traits measured. Taking into account the wealth of theoretical work (Draghi  
312 & Whitlock, 2012; Botero *et al.*, 2015; Ashander *et al.*, 2016; Buckley & Kingsolver, 2019;  
313 Haaland & Botero, 2019) and experimental studies (Ketola & Saarinen, 2015; Schaum *et al.*,  
314 2016, 2018; Kristensen *et al.*, 2018; Saarinen *et al.*, 2018), we expected that the samples from  
315 the Kiel area will have been under selection in a more variable environment, giving rise to  
316 more variable responses with respect to growth.

317 Considering *how* *Ostreococcus* can adjust its growth mechanistically, we conclude that  
318 inorganic and organic carbon were taken up in different quantities depending on the stage of  
319 the microbial growth cycle and temperature to sustain positive growth that we observed  
320 throughout. At early exponential phase, both in strains from Kiel and Bornholm net primary  
321 production was below zero, which means that the carbon necessary to increase biomass could  
322 not have solely come from uptake of  $CO_2$  via photosynthesis. Rather, we found that cell

323 numbers could increase on several organic carbon sources. This means, that likely at this early  
324 stage in the microbial growth curve, *Ostreococcus* sp. used organic carbon sources in the  
325 media to increase cell numbers. The organic carbon in the media could stem for example from  
326 the release of DOC by death of other *Ostreococcus* cells or bacteria (Thornton, 2014; Carlson  
327 & Hansell, 2015). At mid exponential and late exponential phase in the 22°C treatment, net  
328 primary production increased to above zero and the cell increase on carbon sources decreased  
329 to almost zero, indicating that at this stage in the microbial growth curve, growth was  
330 sustained mainly by uptake of CO<sub>2</sub>. However, in the 15°C treatment net primary production  
331 was still below zero and similarly, cells in the 15°C at mid exponential phase also increased  
332 on organic carbon sources compared to 22°C treatment. In summary, we found that when net  
333 primary production was lowest, the potential to grow on organic carbon sources was the  
334 highest and *vice versa* (see Fig. S5). Consequently, there seems to be a shift between the use  
335 of organic *vs* inorganic carbon leading to an increase cell numbers (Fig. S5). The origin of the  
336 strains further affected the likelihood and strength of this shift. In the samples that originated  
337 from the southern more thermally variable Kiel region, we found a stronger shift compared to  
338 the colder less variable Bornholm region (Fig S5). Several studies that have already  
339 investigated organic carbon uptake, found that indeed mixotrophy in microalgae increased  
340 biomass yields (for example (Kang *et al.*, 2004; Liu *et al.*, 2009; Pang *et al.*, 2019)), however,  
341 these studies focused on optimising biofuel generation. It is still unclear, under what “natural”  
342 conditions microalgae preferably grow mixo-trophically or photo-trophically and what  
343 organic compounds may be available under natural conditions (Stickney *et al.*, 2000; Flynn *et*  
344 *al.*, 2013; Mitra *et al.*, 2016).

345 Previous studies have already pointed towards evidence of *Ostreococcus* being able to sustain  
346 growth on sorbitol in the dark for circadian clock research (O'Neill *et al.*, 2011; van Ooijen &  
347 Millar, 2012), but our study provides striking evidence that organic carbon sources are taken  
348 up readily in the light. This requires that we rethink our understanding of photoautotrophs and  
349 go beyond CO<sub>2</sub> uptake. The consequences of the ability to take up organic carbon may be  
350 two-fold: on the one hand, the carbon pool used by *Ostreococcus* may not solely be in the  
351 form of CO<sub>2</sub> but also DOM (dissolved inorganic matter). If, in general, many species of  
352 phytoplankton would indeed use other forms of carbon other than CO<sub>2</sub>, there might be a  
353 consequence on the carbon draw-down from the inorganic pool (Basu & Mackey, 2018). In  
354 particular, less DIC would be used directly for biomass production, but rather carbon would  
355 be taken up indirectly via the microbial shunt. On the other hand, using organic carbon  
356 sources puts the organisms in direct competition with other mixotrophic phytoplankton as

357 well as heterotrophic organisms (e.g. bacteria). This second consequence is likely of more  
358 importance considering species interactions in microbial communities and thus ecosystem  
359 dynamics due to changes in the microbial loop (Meyer, 1994; Fenchel, 2008).

360 Generally, carbon acquisition *via* photosynthesis is cheap (Raven, 1991; Raven & Johnston,  
361 1991) which is why there could be other reasons wherefore organic carbon is readily taken up  
362 by *Ostreococcus* under certain conditions. For example, the uptake of organic carbon  
363 compounds could be a “cheap” acquisition of organic nutrients (e.g. nitrogen, phosphorus)  
364 that are otherwise expensive to produce or acquire. The reduction of nitrate to organically  
365 available nitrogen (the same goes for phosphorous) is energy consuming (Timmermans *et al.*,  
366 1994). And at times where photosynthetic activity is low (i.e. at early and late exponential  
367 phase or lower temperatures), the available energy for such chemical conversions is low as  
368 well. As a result, using organic carbon compounds may be a way for the organism to acquire  
369 organic nutrients in a cheap way and use them for biomass formation and growth. Even if the  
370 growth on organic carbon compounds is not a consequence of requiring more carbon but  
371 rather organic nutrients, the effect this can have on competition that we highlighted above,  
372 may be similar. Whether the sources we tested were an organic carbon or organic nutrient  
373 source, could be investigated *via* the addition of DOC (dissolved organic carbon) or DOP  
374 (dissolved organic phosphorous) or DON (dissolved organic nitrogen) in manipulative  
375 experiments. The uptake of dissolved organic nutrients could then in addition be traced via  
376 mass spectrometry or HPLC (see for example Yan *et al.*, 2012).

377 In this study, the growth on the organic carbon sources was not measured directly in culture,  
378 but rather as a potential to use a given source (ecoplates) (see Methods for details). Therefore,  
379 a manipulative experiment proving that the addition of an organic carbon source directly to  
380 the experimental culture increases growth, would be the next logical step. In addition, testing  
381 the effect of additional organic carbon sources on other functional groups of phytoplankton  
382 and heterotrophic organisms is necessary to characterize the consequence of possible  
383 competition between phototrophic and heterotrophic microbial species and how ecological  
384 dynamics would be affected.

385 In conclusion, we found that a small pico-phytoplankton species from the Baltic Sea does  
386 have an adaptive response to environmental change due to differences in ecological variability  
387 and evolutionary history. However, it is important to understand how growth as a response is  
388 mechanistically increased, as the differences in the carbon uptake related strategies may have

389 implications on ecosystem dynamics and how well an organism can persist in future  
390 environments.

391

392 **Table 1:** This table summarizes the different origins of the strains that were used in the  
 393 experiments. The given parameters of isolation were taken on board the research vessel at the  
 394 time of sampling of the phytoplankton community from which the *Ostreococcus* strains were  
 395 isolated. The sequences for identification via 18S rRNA are uploaded as supplementary data.

| Strain Name  | Species                           | Identification Seq |                  | Sampling location   | Sampling region | Salinity at isolation [PSU] | Temperature at sampling [°C] | Experiment used |
|--------------|-----------------------------------|--------------------|------------------|---------------------|-----------------|-----------------------------|------------------------------|-----------------|
| AL505_St21.1 | <i>Ostreococcus tauri</i>         | 18S_21.1_forward   | 18S_21.1_reverse | 54.3127 N 11.1936 E | Kiel Area       | 15                          | 1,76                         | 1, 4            |
| AL505_St21.2 | <i>Ostreococcus tauri</i>         | 18S_21.2_forward   | 18S_21.2_reverse | 54.3127 N 11.1936 E | Kiel Area       | 15                          | 1,76                         | 2               |
| AL505_St21.3 | <i>Ostreococcus tauri</i>         | 18S_21.3_forward   | 18S_21.3_reverse | 54.3127 N 11.1936 E | Kiel Area       | 15                          | 1,76                         | 3, 4            |
| AL505_St21.4 | <i>Ostreococcus tauri</i>         | 18S_21.4_forward   | 18S_21.4_reverse | 54.3127 N 11.1936 E | Kiel Area       | 15                          | 1,76                         | 2, 4            |
| AL505_St04.3 | <i>Ostreococcus mediterraneus</i> | 18S_4.3_forward    | 18S_4.3_reverse  | 54.343 N 10.3015 E  | Kiel Area       | 15                          | 1,13                         | 1, 4            |
| AL505_St19.1 | <i>Ostreococcus tauri</i>         | 18S_19.1_forward   | 18S_19.1_reverse | 55.3643 N 15.1774 E | Bornholm Basin  | 10                          | 2,14                         | 1, 4            |
| AL505_St19.5 | <i>Ostreococcus mediterraneus</i> | 18S_19.5_forward   | 18S_19.5_reverse | 55.3643 N 15.1774 E | Bornholm Basin  | 10                          | 2,14                         | 3, 4            |
| AL505_St19.9 | <i>Ostreococcus tauri</i>         | 18S_19.9_forward   | 18S_19.9_reverse | 55.3643 N 15.1774 E | Bornholm Basin  | 10                          | 2,14                         | 3               |

396

397

398 **Conflict of interest:** The authors declare no conflict of interest.

399 **Acknowledgements:** We would like to thank Margarethe Nowicki, Richard Klinger, Jens-Peter  
 400 Hermann, and the captain and crew of RV ALKOR for support at sea (cruises AL505 and AL507),  
 401 and Stefanie Schnell for technical assistance in the laboratory at IMF Hamburg. This project was  
 402 funded through a grant by Universitaet Hamburg to ES. Research was also partially funded by the  
 403 Deutsche Forschungsgemeinschaft (DFG, German Research Foundation) under Germany's Excellence  
 404 Strategy – EXC 2037 'CLICCS - Climate, Climatic Change, and Society' – Project Number:  
 405 390683824, contribution to the Center for Earth System Research and Sustainability (CEN) of  
 406 Universität Hamburg”.

407 **Author contributions:** LL, FK and NM carried out the experiments. LL and ES retrieved, prepared,  
 408 and maintained the phytoplankton cultures. LL and ES conceived and designed the experiment,  
 409 supervised laboratory work and LL handled data analysis. LL wrote the first draft of the manuscript.  
 410 All authors contributed equally to writing subsequent versions of the manuscript.

411

412 **References:**

413 **Ashander J, Chevin LM, Baskett ML. 2016.** Predicting evolutionary rescue via evolving  
414 plasticity in stochastic environments. *Proceedings of the Royal Society B: Biological Sciences*  
415 **283.**

416 **Barton S, Jenkins J, Buckling A, Schaum CE, Smirnoff N, Raven JA, Yvon-Durocher G.**  
417 **2020.** Evolutionary temperature compensation of carbon fixation in marine phytoplankton (V  
418 Ezenwa, Ed.). *Ecology Letters*: ele.13469.

419 **Basu S, Mackey KRM. 2018.** Phytoplankton as key mediators of the biological carbon  
420 pump: Their responses to a changing climate. *Sustainability (Switzerland)* **10.**

421 **Botero CA, Weissing FJ, Wright J, Rubenstein DR. 2015.** Evolutionary tipping points in  
422 the capacity to adapt to environmental change. *Proceedings of the National Academy of*  
423 *Sciences of the United States of America* **112**: 184–189.

424 **Boyd PW, Rynearson TA, Armstrong EA, Fu F, Hayashi K, Hu Z, Hutchins DA, Kudela**  
425 **RM, Litchman E, Mulholland MR, et al. 2013.** Marine Phytoplankton Temperature versus  
426 Growth Responses from Polar to Tropical Waters - Outcome of a Scientific Community-Wide  
427 Study. *PLoS ONE* **8.**

428 **Buchanan RL, Whiting RC, Damert WC. 1997.** *When is simple good enough: a*  
429 *comparison of the Gompertz, Baranyi, and three-phase linear models for fitting bacterial*  
430 *growth curves I.*

431 **Buckley LB, Kingsolver JG. 2019.** Environmental variability shapes evolution, plasticity  
432 and biogeographic responses to climate change (A Hampe, Ed.). *Global Ecology and*  
433 *Biogeography* **28**: 1456–1468.

434 **Buitenhuis ET, Li WKW, Vaultot D, Lomas MW, Landry MR, Partensky F, Karl DM,**  
435 **Ulloa O, Campbell L, Jacquet S, et al. 2012.** Earth System Science Data Picophytoplankton  
436 biomass distribution in the global ocean. *Earth Syst. Sci. Data* **4**: 37–46.

437 **Carlson CA, Hansell DA. 2015.** DOM Sources, Sinks, Reactivity, and Budgets. In:  
438 *Biogeochemistry of Marine Dissolved Organic Matter: Second Edition.* Elsevier Inc., 65–126.

439 **Collins S, Schaum CE. 2019.** Diverse strategies link growth rate and competitive ability in  
440 phytoplankton responses to changes in CO<sub>2</sub> levels. *bioRxiv*: 651471.

441 **Courties C, Vaquer A, Troussellier M, Lautier J, Chrétiennot-Dinet MJ, Neveux J,**



- 442 **Machado C, Claustre H. 1994.** Smallest eukaryotic organism. *Nature* **370**: 255–255.
- 443 **Draghi JA, Whitlock MC. 2012.** Phenotypic plasticity facilitates mutational variance,  
444 genetic variance, and evolvability along the major axis of environmental variation. *Evolution*  
445 **66**: 2891–2902.
- 446 **Edwards KF, Klausmeier CA, Litchman E. 2015.** Nutrient utilization traits of  
447 phytoplankton. *Ecology* **96**: 2311–2311.
- 448 **Elena SF, Lenski RE. 2003.** Evolution experiments with microorganisms: The dynamics and  
449 genetic bases of adaptation. *Nature Reviews Genetics*.
- 450 **Falkowski PG, Dubinsky Z, Wyman K. 1985.** Growth–irradiance relationships in  
451 phytoplankton. *Limnology and Oceanography* **30**: 311–321.
- 452 **Falkowski PG, Fenchel T, Delong EF. 2008.** The microbial engines that drive earth’s  
453 biogeochemical cycles. *Science* **320**: 1034–1040.
- 454 **Fenchel T. 2008.** The microbial loop - 25 years later. *Journal of Experimental Marine*  
455 *Biology and Ecology* **366**: 99–103.
- 456 **Field CB, Behrenfeld MJ, Randerson JT, Falkowski P. 1998.** Primary production of the  
457 biosphere: integrating terrestrial and oceanic components. *Science (New York, N.Y.)* **281**: 237–  
458 40.
- 459 **Flynn KJ, Stoecker DK, Mitra A, Raven JA, Glibert PM, Hansen PJ, Granéli E,**  
460 **Burkholder JM. 2013.** Misuse of the phytoplankton-zooplankton dichotomy: The need to  
461 assign organisms as mixotrophs within plankton functional types. *Journal of Plankton*  
462 *Research* **35**: 3–11.
- 463 **García-Carreras B, Sal S, Padfield D, Kontopoulos DG, Bestion E, Schaum CE, Yvon-**  
464 **Durocher G, Pawar S. 2018.** Role of carbon allocation efficiency in the temperature  
465 dependence of autotroph growth rates. *Proceedings of the National Academy of Sciences of*  
466 *the United States of America* **115**: E7361–E7368.
- 467 **Gienapp P, Teplitsky C, Alho JS, Mills JA, Merilä J. 2008.** Climate change and evolution:  
468 disentangling environmental and genetic responses. *Molecular ecology* **17**: 167–78.
- 469 **Godhe A, Rynearson T. 2017.** The role of intraspecific variation in the ecological and  
470 evolutionary success of diatoms in changing environments. *Philosophical Transactions of the*  
471 *Royal Society B: Biological Sciences* **372**: 20160399.

- 472 **Guillard RRL. 1975.** Culture of Phytoplankton for Feeding Marine Invertebrates. In: Culture  
473 of Marine Invertebrate Animals. Boston, MA: Springer US, 29–60.
- 474 **Haaland TR, Botero CA. 2019.** Alternative responses to rare selection events are  
475 differentially vulnerable to changes in the frequency, scope, and intensity of environmental  
476 extremes. *Ecology and Evolution* **9**: 11752–11761.
- 477 **Hackett CA, Griffiths BS. 1997.** Statistical analysis of the time-course of biolog substrate  
478 utilization. *Journal of Microbiological Methods* **30**: 63–69.
- 479 **Halsey KH, O'Malley RT, Graff JR, Milligan AJ, Behrenfeld MJ. 2013.** A common  
480 partitioning strategy for photosynthetic products in evolutionarily distinct phytoplankton  
481 species. *New Phytologist* **198**: 1030–1038.
- 482 **Hattich GSI, Listmann L, Raab J, Ozod-Seradj D, Reusch TBH, Matthiessen B. 2017.**  
483 Inter-and intraspecific phenotypic plasticity of three phytoplankton species in response to  
484 ocean acidification. *Biology Letters* **13**.
- 485 **IPCC Fifth Assessment Report - Synthesis Report. 2014.**
- 486 **Kang R, Wang J, Shi D, Cong W, Cai Z, Ouyang F. 2004.** Interactions between organic  
487 and inorganic carbon sources during mixotrophic cultivation of *Synechococcus* sp.  
488 *Biotechnology Letters* **26**: 1429–1432.
- 489 **Ketola T, Saarinen K. 2015.** Experimental evolution in fluctuating environments: Tolerance  
490 measurements at constant temperatures incorrectly predict the ability to tolerate fluctuating  
491 temperatures. *Journal of Evolutionary Biology* **28**: 800–806.
- 492 **Kristensen TN, Ketola T, Kronholm I. 2018.** Adaptation to environmental stress at different  
493 timescales. *Annals of the New York Academy of Sciences*.
- 494 **Lenski RE, Travisano M. 1994.** Dynamics of adaptation and diversification: a 10,000-  
495 generation experiment with bacterial populations. *Proceedings of the National Academy of*  
496 *Sciences of the United States of America* **91**: 6808–14.
- 497 **Leppäranta, Matti KM-. 2009.** Physical Oceanography of the Baltic Sea. *Springer-Verlag*  
498 *New York*.
- 499 **Levis NA, Pfennig DW, Mayr E, Wagner GP, Lynch VJ, Carroll SB, West-Eberhard**  
500 **MJ, Badyaev AV, Pigliucci M, Al. E, et al. 2016.** Evaluating ‘Plasticity-First’ Evolution in  
501 Nature: Key Criteria and Empirical Approaches. *Trends in Ecology & Evolution* **31**: 563–574.

- 502 **Likens GE. 1989.** *Long-Term Studies in Ecology*. Springer New York.
- 503 **Listmann L, Leroch M, Schlüter L, Thomas MK, Reusch TBH. 2016.** Swift thermal  
504 reaction norm evolution in a key marine phytoplankton species. *Evolutionary Applications*.
- 505 **Liu X, Duan S, Li A, Xu N, Cai Z, Hu Z. 2009.** Effects of organic carbon sources on  
506 growth, photosynthesis, and respiration of *Phaeodactylum tricornutum*. *Journal of Applied*  
507 *Phycology* **21**: 239–246.
- 508 **Lohbeck KT, Riebesell U, Reusch TBH. 2012.** Adaptive evolution of a key phytoplankton  
509 species to ocean acidification. *Nature Geoscience* **5**: 346–351.
- 510 **Meyer JL. 1994.** The microbial loop in flowing waters. *Microbial Ecology* **28**: 195–199.
- 511 **Mitra A, Flynn KJ, Tillmann U, Raven JA, Caron D, Stoecker DK, Not F, Hansen PJ,**  
512 **Hallegraeff G, Sanders R, et al. 2016.** Defining Planktonic Protist Functional Groups on  
513 Mechanisms for Energy and Nutrient Acquisition: Incorporation of Diverse Mixotrophic  
514 Strategies. *Protist* **167**: 106–120.
- 515 **O'Neill JS, Van Ooijen G, Dixon LE, Troein C, Corellou F, Bouget FY, Reddy AB,**  
516 **Millar AJ. 2011.** Circadian rhythms persist without transcription in a eukaryote. *Nature* **469**:  
517 554–558.
- 518 **van Ooijen G, Millar AJ. 2012.** Non-transcriptional oscillators in circadian timekeeping.  
519 *Trends in Biochemical Sciences* **37**: 484–492.
- 520 **Padfield D, Yvon-Durocher G, Buckling A, Jennings S, Yvon-Durocher G. 2016.** Rapid  
521 evolution of metabolic traits explains thermal adaptation in phytoplankton. *Ecology Letters*  
522 **19**: 133–142.
- 523 **Pang N, Gu X, Chen S, Kirchhoff H, Lei H, Roje S. 2019.** Exploiting mixotrophy for  
524 improving productivities of biomass and co-products of microalgae. *Renewable and*  
525 *Sustainable Energy Reviews* **112**: 450–460.
- 526 **Raven JA. 1991.** Physiology of inorganic C acquisition and implications for resource use  
527 efficiency by marine phytoplankton: relation to increased CO<sub>2</sub> and temperature. *Plant, Cell &*  
528 *Environment* **14**: 779–794.
- 529 **Raven JA, Johnston AM. 1991.** Mechanisms of inorganic carbon acquisition in marine  
530 phytoplankton and their implications for the use of other resources. *Limnology and*  
531 *Oceanography* **36**: 1701–1714.

- 532 **Rebecca Lindsey B, Scott Design by Robert Simmon M. 2010.** *What are Photoplankton?*  
533 *Retrieved from.*
- 534 **Reusch TBH, Boyd PW. 2013.** Experimental Evolution Meets Marine Phytoplankton.  
535 *Evolution* **67**: 1849–1859.
- 536 **Des Roches S, Post DM, Turley NE, Bailey JK, Hendry AP, Kinnison MT, Schweitzer**  
537 **JA, Palkovacs EP. 2018.** The ecological importance of intraspecific variation. *Nature*  
538 *Ecology & Evolution* **2**: 57–64.
- 539 **Rodríguez F, Derelle E, Guillou L, Le Gall F, Vaultot D, Moreau H. 2005.** Ecotype  
540 diversity in the marine picoeukaryote *Ostreococcus* (Chlorophyta, Prasinophyceae).  
541 *Environmental Microbiology* **7**: 853–859.
- 542 **Rokitta SD, Von Dassow P, Rost B, John U. 2016.** P- and N-starvation trigger the same  
543 cellular responses to promote senescence in eukaryotic phytoplankton. *Frontiers in Marine*  
544 *Science* **3**: 109.
- 545 **Rost B, Riebesell U, Sültemeyer D. 2006.** Carbon acquisition of marine phytoplankton.  
546 *Limnology and Oceanography* **51**: 12–20.
- 547 **Rutgers M, Wouterse M, Drost SM, Breure AM, Mulder C, Stone D, Creamer RE,**  
548 **Winding A, Bloem J. 2016.** Monitoring soil bacteria with community-level physiological  
549 profiles using Biolog<sup>TM</sup> ECO-plates in the Netherlands and Europe. *Applied Soil Ecology* **97**:  
550 23–35.
- 551 **Saarinen K, Laakso J, Lindström L, Ketola T. 2018.** Adaptation to fluctuations in  
552 temperature by nine species of bacteria. *Ecology and Evolution* **8**: 2901–2910.
- 553 **Schaum CE, Barton S, Bestion E, Buckling A, Garcia-Carreras B, Lopez P, Lowe C,**  
554 **Pawar S, Smirnov N, Trimmer M, et al. 2017a.** Adaptation of phytoplankton to a decade of  
555 experimental warming linked to increased photosynthesis. *Nature Ecology and Evolution* **1**.
- 556 **Schaum C-E, Barton S, Bestion E, Buckling A, Garcia-Carreras B, Lopez P, Lowe C,**  
557 **Pawar S, Smirnov N, Trimmer M, et al. 2017b.** Adaptation of phytoplankton to a decade of  
558 experimental warming linked to increased photosynthesis. *Nature Ecology & Evolution* **1**:  
559 0094.
- 560 **Schaum CE, Buckling A, Smirnov N, Studholme DJ, Yvon-Durocher G. 2018.**  
561 Environmental fluctuations accelerate molecular evolution of thermal tolerance in a marine

- 562 diatom. *Nature Communications* **9**: 1–14.
- 563 **Schaum C-E, Rost B, Collins S. 2016.** Environmental stability affects phenotypic evolution  
564 in a globally distributed marine picoplankton. *The ISME Journal* **10**: 75–84.
- 565 **Schlüter L, Lohbeck KT, Gutowska MA, Gröger JP, Riebesell U, Reusch TBH. 2014.**  
566 Adaptation of a globally important coccolithophore to ocean warming and acidification.  
567 *Nature Climate Change* **4**: 1024–1030.
- 568 **Sommer U. 1984.** The paradox of the plankton: Fluctuations of phosphorus availability  
569 maintain diversity of phytoplankton in flow-through cultures. *Limnology and Oceanography*  
570 **29**: 633–636.
- 571 **Stickney HL, Hood RR, Stoecker DK. 2000.** The impact of mixotrophy on planktonic  
572 marine ecosystems. *Ecological Modelling* **125**: 203–230.
- 573 **Thornton DCO. 2014.** Dissolved organic matter (DOM) release by phytoplankton in the  
574 contemporary and future ocean. *European Journal of Phycology* **49**: 20–46.
- 575 **Timmermans KR, Stolte W, de Baar HJW. 1994.** Iron-mediated effects on nitrate reductase  
576 in marine phytoplankton. *Marine Biology* **121**: 389–396.
- 577 **Wiser MJ, Ribick N, Lenski RE. 2013.** Long-Term Dynamics of Adaptation in Asexual  
578 Populations. *Science* **342**: 1364–1367.
- 579 **Worden A. 2006.** Picoeukaryote diversity in coastal waters of the Pacific Ocean. *Aquatic*  
580 *Microbial Ecology* **43**: 165–175.
- 581 **Worden AZ, Nolan JK, Palenik B. 2004.** Assessing the dynamics and ecology of marine  
582 picophytoplankton: The importance of the eukaryotic component. *Limnology and*  
583 *Oceanography* **49**: 168–179.
- 584 **Yan M, Korshin G, Wang D, Cai Z. 2012.** Characterization of dissolved organic matter  
585 using high-performance liquid chromatography (HPLC)-size exclusion chromatography  
586 (SEC) with a multiple wavelength absorbance detector. *Chemosphere* **87**: 879–885.
- 587 **Zhong D, Listmann L, Santelia M-E, Schaum C-E. 2020.** Functional redundancy in natural  
588 pico-phytoplankton communities depends on temperature and biogeography. *Biology Letters*  
589 **16**: 20200330.
- 590

591

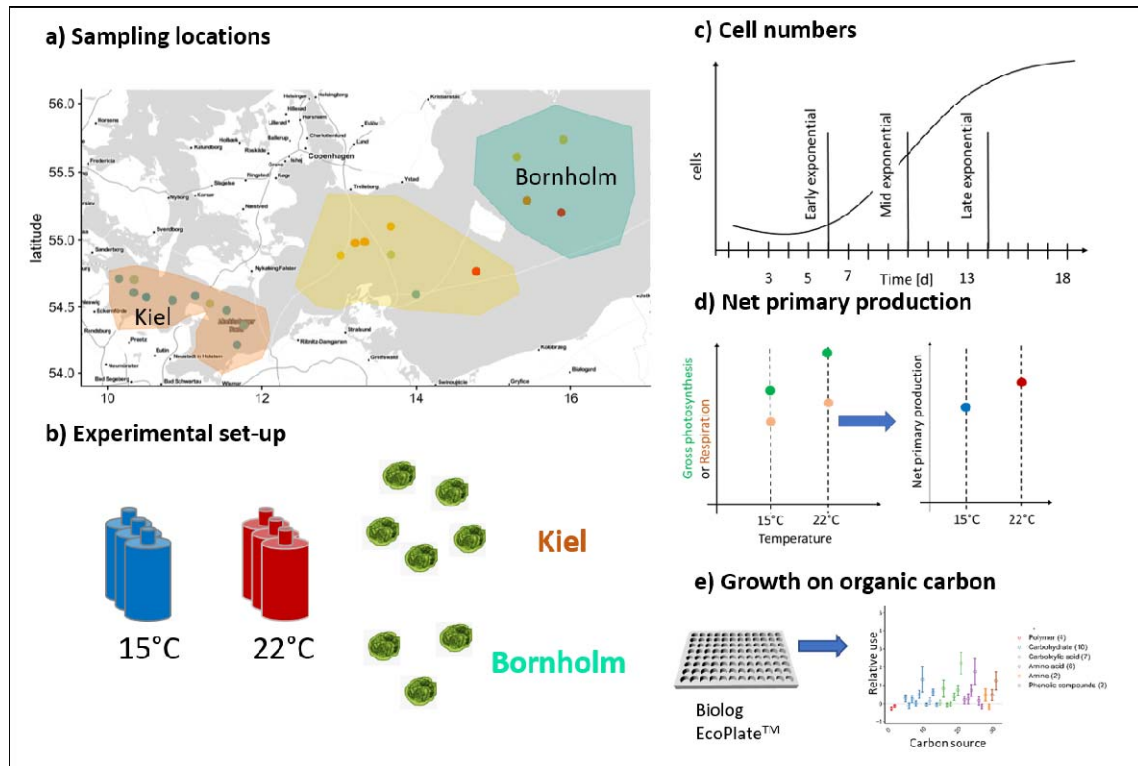

592

593 **Figure 1.** Sampling locations and experimental set-up: The pico-phytoplankton communities from  
594 which we isolated *Ostreococcus* sp. were collected during two research cruises in March and August  
595 2018 and originate from Kiel and Bornholm area (panel a). Eight successfully isolated strains of  
596 *Ostreococcus* sp. were exposed to 15°C and 22°C (panel b) in four consequent experiments and  
597 monitored daily for growth via tracking cell numbers (panel c). In addition, we measured net primary  
598 production daily (panel d) in experiment 1-3 and in experiment 4 we investigated potential growth on  
599 organic carbon at three time points of the microbial growth curve (panel e).

600



601

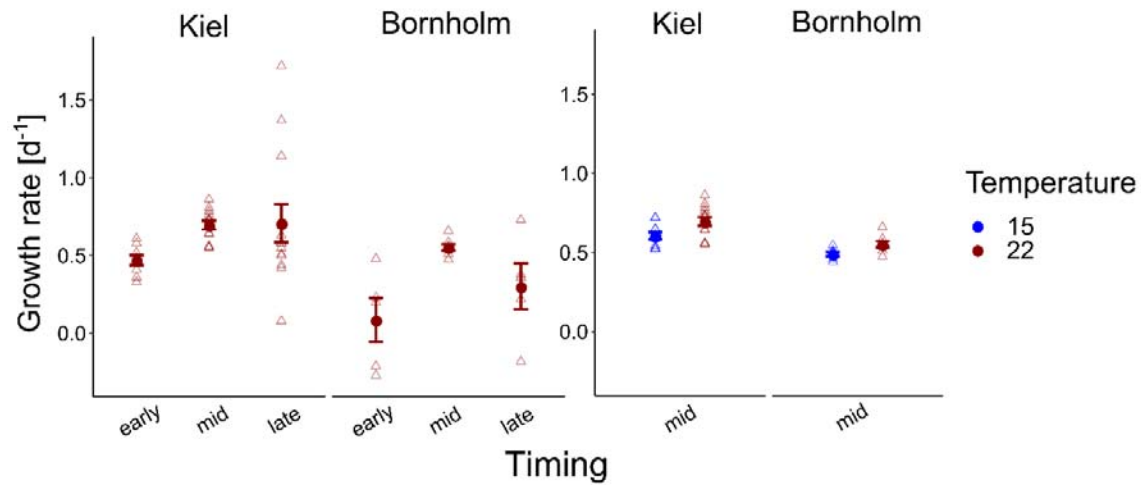

602

603 **Figure 2.** Growth rates are shown here at 22°C (red) at early, mid and late exponential phase in the  
604 left panel and at 15°C (blue) and 22°C (red) at mid exponential phase in the right panel. Note that for  
605 the growth rate at mid exponential phase we used a logarithmic curve fit to all numbers collected  
606 during the experiment whereas early and late exponential growth rates were estimated via  $\ln(N_t - N_{t-1})$   
607 three days prior and after the day where growth was maximum. All points show mean  $\pm$  1 SE  
608 including  $n=15$  and  $n=9$  for Kiel and Bornholm, respectively. Triangles present the growth rate of each  
609 experimental unit.

610

611

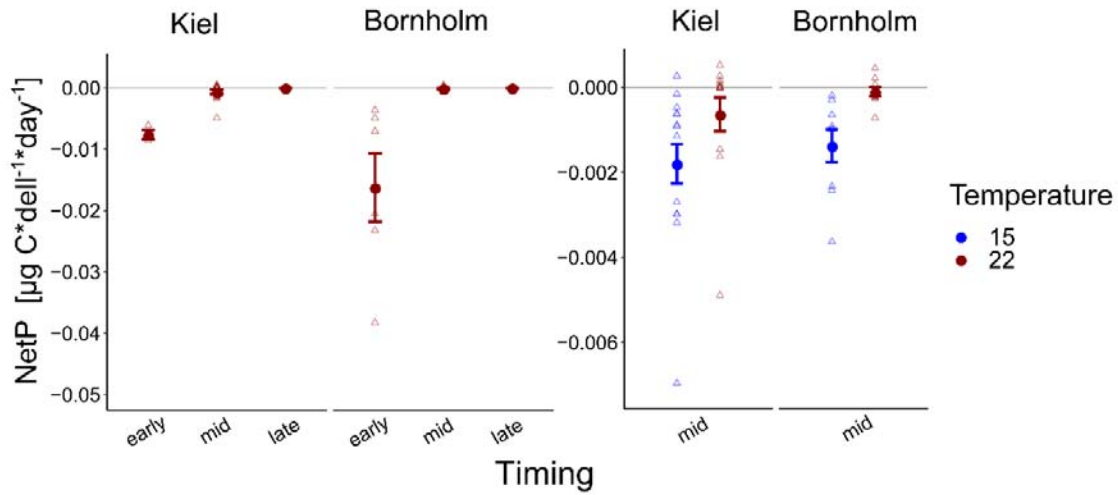

612

613 **Figure 3.** Net primary production (NetP= is shown here at 22°C (red) at early, mid and late  
614 exponential phase in the left panel and at 15°C (blue) and 22°C (red) at mid exponential phase in the  
615 right panel. Note that the axes are different between the panels due to the strong increase in net  
616 primary production from early to mid exponential phase. All points show mean  $\pm$  1 SE including  
617  $n=15$  and  $n=9$  for Kiel and Bornholm, respectively. Triangles present the net primary production of  
618 each experimental unit.

619

620

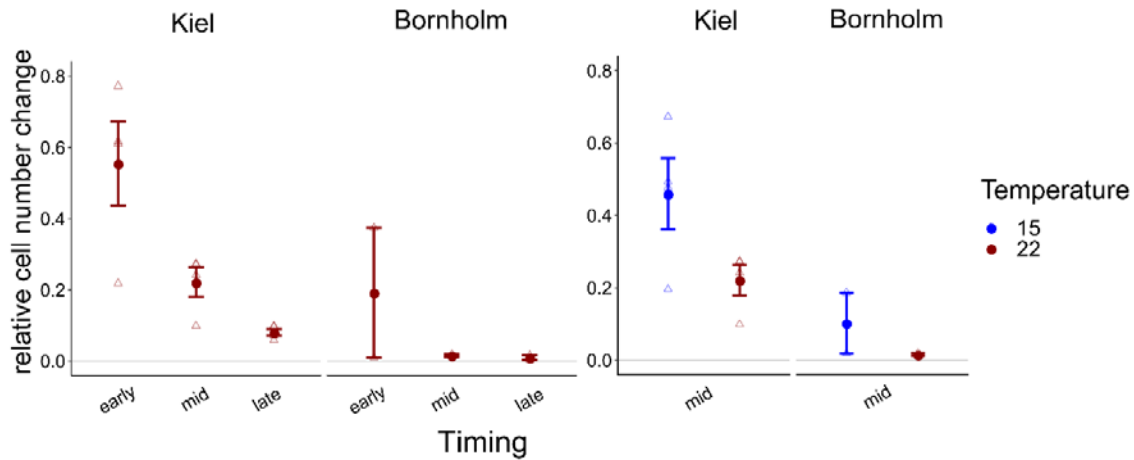

621

622 **Figure 4.** Overall relative increase in cell numbers on carbon normalized by the number of sources on  
623 which we found positive growth is shown here: in the left panel the growth at 22°C (red) at early, mid  
624 and late exponential phase is shown, whereas in the right panel relative growth at mid exponential  
625 phase at 15°C (blue) and 22°C (red) degrees is shown. All points show mean  $\pm$  1 SE including n=4  
626 and n=2 for Kiel and Bornholm, respectively. Triangles present the overall growth on organic carbon  
627 per ecoplate of each experimental unit.

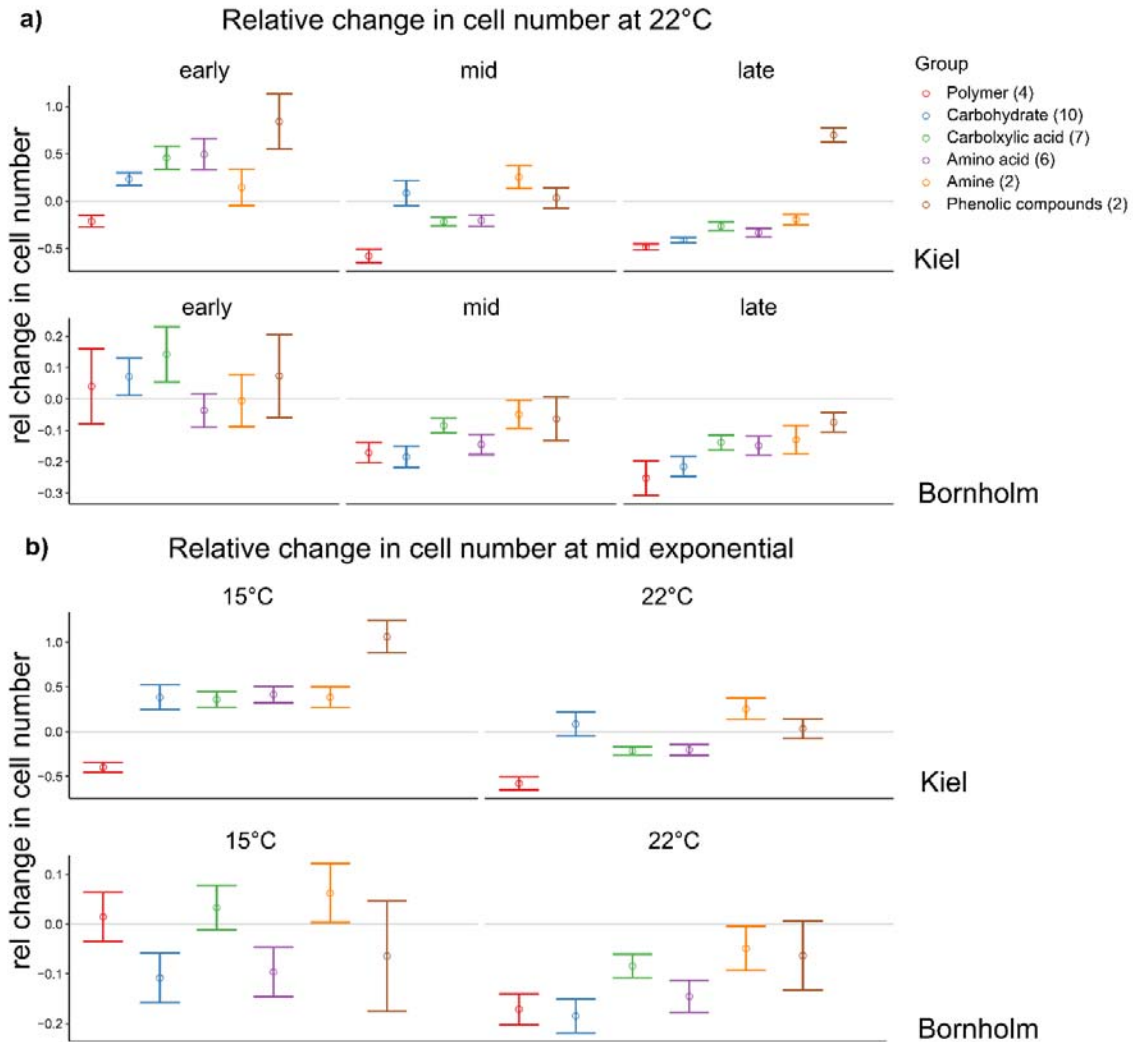

628

629 **Figure 5.** Relative change in cell numbers on the different carbon compound groups. The colours code  
630 for the different groups of carbon sources each source belongs to and on which we did the statistical  
631 analysis. Shown here are mean  $\pm$  1 SE for each group. However, each group contains different  
632 numbers of carbon sources (number in brackets) and a total of triplicate/source measurements of 4 or 2  
633 strains for Kiel and Bornholm samples, respectively.

634
